1 **MIN1PIPE: A Miniscope 1-photon-based Calcium Imaging Signal Extraction**  
2 **Pipeline**

3 Jinghao Lu<sup>1\*</sup>, Chunyuan Li<sup>3\*</sup>, Jonnathan Singh-Alvarado<sup>1</sup>, Zhe Charles Zhou<sup>4,5</sup>, Flavio  
4 Fröhlich<sup>4,5</sup>, Richard Mooney<sup>1</sup>, and Fan Wang<sup>1,2\*</sup>

5 <sup>1</sup>Department of Neurobiology, Duke University Medical Center, Duke University, Durham  
6 NC 27708, USA

7 <sup>2</sup>Department of Cell Biology, Duke University Medical Center, Duke University, Durham  
8 NC 27708, USA

9 <sup>3</sup>Department of Electrical and Computer Engineering, Duke University, Durham NC 27708,  
10 USA

11 <sup>4</sup>Department of Psychiatry, University of North Carolina at Chapel Hill, Chapel Hill NC  
12 27599, USA.

13 <sup>5</sup>Neurobiology Curriculum, University of North Carolina at Chapel Hill, Chapel Hill NC  
14 27599, USA

15

16

17 \*Correspondence should be addressed to: Jinghao Lu ([jinghao.lu@duke.edu](mailto:jinghao.lu@duke.edu)), Chunyuan  
18 Li ([chunyuan.li@duke.edu](mailto:chunyuan.li@duke.edu)) and Fan Wang ([fan.wang@duke.edu](mailto:fan.wang@duke.edu))

## 19 **SUMMARY**

20 In vivo calcium imaging using 1-photon based miniscope and microendoscopic lens  
21 enables studies of neural activities in freely behaving animals. However, the high and  
22 fluctuating background, the inevitable movements and distortions of imaging field, and the  
23 extensive spatial overlaps of fluorescent signals emitted from imaged neurons inherent in  
24 this 1-photon imaging method present major challenges for extracting neuronal signals  
25 reliably and automatically from the raw imaging data. Here we develop a unifying  
26 algorithm called MINiscope 1-photon imaging PIPEline (MIN1PIPE) that contains several  
27 standalone modules and can handle a wide range of imaging conditions and qualities with  
28 minimal parameter tuning, and automatically and accurately isolate spatially localized  
29 neural signals. We quantitatively compare MIN1PIPE with other existing partial methods  
30 using both synthetic and real datasets obtained from different animal models, and show  
31 that MIN1PIPE has a superior performance both in terms of efficiency and precision in  
32 analyzing noisy miniscope calcium imaging data.

### 33 INTRODUCTION

34 In vivo calcium imaging of activities from large populations of neurons in awake and  
35 behaving animals has become one of the staple technologies in neuroscience (Cai et al.,  
36 2016; Flusberg et al., 2008; Ghosh et al., 2011). Recent advances in single-photon based  
37 miniscope technology have further enabled imaging of neural ensemble activities in freely  
38 moving animals (Cai et al., 2016; Flusberg et al., 2008; Ghosh et al., 2011), thereby  
39 allowing circuits involved in a rich repertoire of animal behaviors to be examined. For  
40 example, this technology has been successfully used in probing dynamics of neural circuits  
41 involved in innate behaviors (Betley et al., 2015; Douglass et al., 2017; Jennings et al.,  
42 2015), decision making (Pinto and Dan, 2015; Poyraz et al., 2016), motor control (Klaus  
43 et al., 2017), learning and memory (Grewe et al., 2017; Kamigaki and Dan, 2017; Kitamura  
44 et al., 2017; Roberts et al., 2017; Roy et al., 2017; Xu et al., 2016), social memory  
45 (Okuyama et al., 2016), hippocampal place coding (Ziv et al., 2013), sleep (Cox et al., 2016;  
46 Weber and Dan, 2016), bird song (Markowitz et al., 2015), and pathological processes  
47 (Berdyeva et al., 2016).

48 The increasing popularity of the miniscope calcium imaging technology demands the  
49 development of a fully automatic and robust signal processing method that can reliably  
50 extract neuronal signals from the noisy single photon calcium imaging data. Ideally, the  
51 processing method 1) should be able to handle a wide range of imaging conditions (*e.g.*  
52 high fluctuating background) and results with minimal parameter tuning, and 2) should  
53 have minimal assumptions about the quality of the data, such as free of movement or  
54 distortion, or sufficiently good signal-to-noise ratio (SNR). Existing imaging processing  
55 algorithms do not meet these two criteria.

56 For extraction of neuronal signals, many previous methods work well in situations with  
57 high SNR and stable field of views, therefore they are best suited for processing two-photon  
58 imaging data. These algorithms include linear unsupervised basis learning methods  
59 (Mukamel et al., 2009; Reidl et al., 2007; Pachitariu et al., 2013), nonlinear unsupervised  
60 methods (Maruyama et al., 2014; Pnevmatikakis et al., 2016), and the supervised learning  
61 method (Apthorpe et al., 2016). The PCA/ICA (principal component analysis followed by  
62 independent component analysis) method (Mukamel et al., 2009) was the first attempt to  
63 automatize the signal extraction process from miniscope imaging data through manual  
64 annotations of ROIs, but this method has difficulties in delineating localized ROIs and in  
65 separating overlapping ROIs. Since single-photon based imaging collect lights from a large  
66 depth of field, overlapping neurons in different depth is not uncommon. Another method  
67 called CNMF (constraint matrix factorization framework) (Pnevmatikakis et al., 2016),  
68 which combines nonlinearity in matrix factorization with simultaneous deconvolving spike  
69 trains from calcium dynamics, returns more spatially localized maps of ROIs compared to  
70 other methods and has better performance in identifying overlapping neurons. While  
71 methods like CNMF achieve plausible results in processing two-photon imaging data, they  
72 are ill-suited for processing the single-photon based miniscope imaging because: 1) the  
73 data from miniscope imaging are dominated by noisy, uneven and fluctuating background,  
74 2) such methods depend on sophisticated parameter tuning, especially requiring setting  
75 parameters that are unknown *a priori* in practice such as “number of neurons”. Thus, a new  
76 method that can effectively remove background yet preserve real neural signals is highly  
77 desired.

78 Moreover, both PCA/ICA and CNMF rely on the stable imaging field and will fail if the  
79 imaging field contains movement, but movements (including distortions) during imaging,  
80 are often inevitable. Therefore, correcting movements and distortions is another major  
81 problem needs solving before neural activity signals can be reliably extracted. Many  
82 methods were developed independently in attempt to solve this problem. For example,  
83 several approaches register frames through template matching based on the assumption  
84 that the major form of movements is translational displacement (Dubbs et al., 2016;  
85 Thévenaz et al., 1998). To eliminate such assumptions, methods with block-based  
86 displacement field estimation were developed, with image feature matching algorithms  
87 extended from Lucas-Kanade tracker (Greenberg and Kerr, 2009; Lucas and Kanade, 1981)  
88 or Hidden Markov Models (Dombeck et al., 2007; Kaifosh et al., 2013). Some of these  
89 movement correction methods have been included as a module in a larger toolbox, using  
90 such frame-wise rigid registration approaches (Kaifosh et al., 2014; Pachitariu et al., 2017).  
91 When applied to handle nonrigid movement registrations, existing methods make specific  
92 assumptions about both the form and magnitude of the potential movements that result in  
93 suboptimal performance when large deformation occurs during imaging. Furthermore,  
94 errors in the movement correction can easily propagate since these methods all register  
95 frames based on a single reference frame. Considering that extracting neural activity  
96 signals is highly dependent on removing movement artifacts, an accurate and robust  
97 movement correction module is imperative. A simple unimodal algorithm for either  
98 translation/rigid or nonrigid registration is insufficient for this purpose.

99 Here we develop the MINiscope 1-photon imaging signal extraction PIPEline (MIN1PIPE)  
100 that takes the very raw calcium videos as inputs, and automatically removes background

101 while preserving signals, corrects movements with no assumptions of the types of  
102 movements, and delivers separated neuronal ROIs as well as deconvolved calcium traces  
103 as outputs. The MIN1PIPE contains a neural enhancing module that minimizes the  
104 influence of background unevenness and fluctuations, a hierarchical movement correction  
105 module that can handle all kinds of deformation with minimal error propagation, and a  
106 seeds-cleansed neural signal extraction module that identifies the set of real ROIs and their  
107 corresponding calcium traces without setting unknown parameters *a priori* (Fig. 1).  
108 Though our MIN1PIPE is primarily developed for single-photon based miniscope imaging,  
109 individual modules can also be independently combined with other processing algorithms  
110 to improve performance in analyzing two-photon imaging.

## 111 **RESULTS**

### 112 **Core modules in MIN1PIPE**

113 ***Neural Enhancing Module:*** The core of MIN1PIPE relies on turning the imaging data into  
114 a stack of background free, baseline corrected frames as the first step. Due to the complex  
115 spatiotemporal properties of background dynamics, our method applies a frame-wise  
116 background estimator that is adaptive to the local properties. A natural idea can be  
117 translated from mathematical morphology and computer vision, that the foreground neural  
118 signals can be approximated by subtracting the estimated background in a denoised image.  
119 Therefore, we first remove the grainy noise inherent to the single-photon system (see  
120 example of such grainy noise in Supplementary Fig. S2) while preserving the boundary  
121 between foreground and background, and this is achieved by applying an *anisotropic*  
122 *diffusion* denoising operation (Perona and Malik, 1990) on the raw imaging frames. Next,  
123 we use a simple straightforward *morphological opening* operation (Serra and Vincent,

124 1992) as the background estimator, with the size of the structure element similar to that of  
125 the neurons in the imaging field. The opening operation removes structures smaller than  
126 the desired structure element. Subsequently, the foreground that contains all the neuronal  
127 signals with the minimal noise is computed as the difference between the denoised raw and  
128 the morphological opened frames (Fig. 1a and Supplementary Fig. S1-S2).

129 ***Movement Correction Module***: After the neural signals are enhanced, we next correct for  
130 movements in the imaging videos. The problem of movement correction can essentially be  
131 broken down to image stack registration. However, without setting specific constraints on  
132 the form or magnitude of the movements, even the most efficient registration algorithms  
133 require a running time on the order of seconds to minutes per frame (Vercauteren et al.,  
134 2009). Considering that the general imaging datasets contain tens of thousands of frames,  
135 the time required for applying these sophisticated image registration methods to every  
136 frame is inconceivable. Here we develop a hierarchical video registration framework for  
137 the correction of all types of movement, without sacrificing the precision or the speed of  
138 corrections. Our framework first decomposes the imaging video into two sections: the  
139 *stable sections* whose movements can be approximated by small translational displacement,  
140 and the *non-stable sections* that contain large general deformation. This step uses the KLT  
141 tracker that estimates the displacement of potential corner-like features between two  
142 neighboring frames (Shi and Tomasi, 1994). Next, we employ three levels of different  
143 strategies to align images. At the first level, we correct the small translational displacement  
144 within each stable section using the fast Lucas-Kanade tracker, which can be performed  
145 efficiently in parallel on multiple sections (Lucas et al., 1981). We then incorporate a  
146 diffeomorphic Log-Demons image registration method which can handle large

147 deformations while preserving the local geometrical properties (Vercauteren et al., 2009).  
148 At the second level, we align all the stable sections. The overall information of each section  
149 is extracted to form a sectional image. The current sectional image is then aligned to a  
150 reference sectional image, which is generated as a linear summation of all previously  
151 registered sectional images that is the closest to the current image. The summation weights  
152 are determined by least square regression between the current and previous sectional  
153 images. The estimated displacement field is then applied to each frame within the current  
154 section. This will be iterated until all stable sections are aligned. At the third level, we use  
155 a similar process to register the individual frames within each non-stable section, which  
156 can be parallelized to boost performance efficiency (Fig. 1b). This hierarchical approach  
157 significantly reduces the total registration time due to the balanced assignment of different  
158 methods. Importantly, the common registration error does not propagate with this approach.

159 *Seeds-Cleansed Neural Signal Extraction Module*: Once movements are corrected and  
160 images are aligned, the main task turns to the neural signal extraction. MINPIPE extracts  
161 neural signals automatically in two main steps, 1) the seeds cleansing step to reliably detect  
162 the set of real ROIs, and 2) an altered spatiotemporal CNMF to separate ROIs and  
163 corresponding calcium traces (Pnevmatikakis et al., 2016). Previous methods contain either  
164 no explicit seeds initialization step or only a coarse initialization that compromises between  
165 precision and recall. In contrast, our seeds cleansing step forces the algorithm to find the  
166 set of real ROIs. This is achieved by first generating an over-complete set of seeds  
167 containing all potential centers of real ROIs at the cost of including false positives. This  
168 over-complete set is then coarsely cleansed by applying a two-component Gaussian  
169 Mixture Model (GMM) on the peak-valley difference of corresponding traces of the seeds,



170 where the traces of real neurons usually have larger fluctuations compared to the non-  
171 neuron false positive seeds. The GMM removes most background false positives without  
172 losing real neurons (Supplementary Fig. S3). To further remove the remaining false  
173 positives, such as the ones with abnormal background fluctuations or hemodynamics, we  
174 have trained an Recurrent Neural Networks (RNNs) with LSTM module offline as the  
175 classifier for calcium spikes (Supplementary Fig. S4) (LeCun et al., 2015; Hochreiter and  
176 Schmidhuber, 1997). Those seeds whose traces contain RNN-identified calcium spikes,  
177 regardless of their temporal locations, are classified as true positives whereas the rest are  
178 deemed as false positives. After such cleansing processes, there is still a low possibility of  
179 identifying multiple seeds within a single ROI. Therefore, we merge potentially redundant  
180 seeds by computing the temporal similarity of seeds within their neighborhoods, and  
181 preserving the ones with maximum intensity. With the cleansed set of seeds as the initial  
182 position of ROIs, we next perform the iterative spatial and temporal optimizations, as  
183 proposed in CNMF, to update the spatial footprints of individual ROIs, and the temporal  
184 traces with deconvolved spike trains. Notably, unlike previous CNMF, where the spatial  
185 footprints are sequentially updated and subtracted from the preceding residuals, we extract  
186 spatial footprints from the original data that does not depend on preceding iterations.  
187 Therefore, the information loss/duplication is reduced and the optimization procedures can  
188 be parallelized in our method.

189 We show example results obtained using the MIN1PIPE methodology including a raw  
190 frame, the fully processed ROIs and the example traces from ROIs (Fig. 1c).

### 191 **Quantitative validation of the MIN1PIPE performance**

192 The neural signal extraction and movement correction are two independent problems that  
193 can be tested separately. For the signal extraction, we test the performance on synthetic  
194 datasets with various signal levels, while for the movement correction, we can directly test  
195 it on real data. To measure the performance of the signal extraction, we use a scoring metric  
196 that evaluates the spatial and temporal similarity between the ground truth and the  
197 identified ROIs (see Online Methods), and calculate true positive, false positive and false  
198 negative. To measure the performance of the movement correction, we use a metric based  
199 on the average displacement of feature points between neighboring frames.

200 We synthesized 16 imaging videos with signal levels (SL, defined as the ratio of the  
201 amplitude between the signals and the background) ranging from 0.05 to 0.8. Each video  
202 contains 3000 frames with 100 neurons of various shapes and calcium dynamics, and  
203 background fluctuations extracted from real datasets (details in Supplementary Notes S1-  
204 S2). The properties of synthetic videos resemble those of real data, whose SL falls between  
205 the range of 0.2 and 0.8. The condition at 0.05 SL is an extreme (Supplementary Fig. S5  
206 and Video S1-S3). We compare MIN1PIPE with PCA/ICA and CNMF. We used  
207 commercially available *Mosaic* software (Inscopix Inc.) which implements PCA/ICA  
208 method (Mukamel et al., 2009), and processed the data following the standard workflow  
209 in the software manual. In particular, we chose the number of principal components (PC)  
210 and independent components (IC) based on the suggested rate (*e.g.* 20% more ICs and 50%  
211 more PCs than the estimated number of ROIs). For CNMF, we used the default  
212 initialization strategy in (Pnevmatikakis et al., 2016).

213 The results of ROI detection (Fig. 2a) and the calcium traces from one example ROI  
214 obtained by different methods (Fig. 2b) at 0.2 and 0.8 SL are compared. The contours of

215 the identified ROIs using different methods are drawn and superimposed onto the max  
216 projection of the ground truth. For both SLs, MIN1PIPE can identify the nearly complete  
217 set of ROIs (93% and 100% for 0.2 and 0.8 SL respectively) with minimal false positives  
218 (1% and 0% respectively), whereas the other two methods detect partial subsets of ROIs  
219 (PCA/ICA: 0% at 0.2 SL and ~65% true positives at 0.8 SL; CNMF: ~32% at 0.2 SL and  
220 ~95% true positives at 0.8 SL). In addition, the extracted spatial footprints are less realistic  
221 with the PCA/ICA or previous CNMF methods. The example calcium traces indicate that  
222 MIN1PIPE has a near-optimal performance in extracting individual ROIs even at low SLs  
223 when compared to the ground truth traces (Fig. 2b). In contrast, PCA/ICA completely fails  
224 to identify ROIs when SL is low, while CNMF fails to separate neurons from overlapping  
225 ROIs. Fig. 2c summarizes the performance accuracy of these three methods at all SLs. The  
226 plots of the true positive, false positive and false negative indicate that MIN1PIPE has a  
227 significantly superior performance in all conditions, and outperforms the other two  
228 methods in the extreme conditions. Fig. 2d summarizes the spatiotemporal similarities  
229 between the extracted results and the ground truth. The clusters of point clouds confirm  
230 again that MIN1PIPE outperforms the other two methods in best resembling both the  
231 spatial and temporal properties of the ground truth signals. The results for all signal levels  
232 are shown in Supplementary Fig. S6.

233 To validate the performance of the movement correction in MIN1PIPE, we applied the  
234 module on video sections with large deformation movements of the imaging field.  
235 Specifically, we chose a video obtained through two-photon imaging of the ferret's  
236 posterior parietal cortex as an example due to its particularly frequent and large  
237 deformations (Supplementary Video S4 as a demo section of the full video). Fig. 2e shows

238 an example of 3 consecutive frames (with each frame pseudo-colored as pink, green or  
239 blue) with large nonlinear deformations between frames superimposed together. The two  
240 rigid-transform-based methods (LK and KLT Affine) by themselves fail to fully remove  
241 the large deformations, whereas MIN1PIPE (combining the Log-Demons transformation)  
242 succeeds in correcting these movements. We further quantified the extent of correction by  
243 calculating the average displacement of feature points between two neighboring frames  
244 before and after the movement correction (Fig. 2f). Before correction, the score of average  
245 displacement shows frequent burst of large deformation periods, whereas after correction,  
246 the score of displacement shows a nearly flat line. Notably, the frames with large  
247 deformations are all well aligned (Fig. 2f lower panels; Supplementary Video S4).

#### 248 **Application of MIN1PIPE on real miniscope imaging datasets**

249 We next compare the performance of MIN1PIPE with PCA/ICA and CNMF methods on  
250 real datasets. We first applied the three methods to the miniscope calcium imaging data  
251 obtained using prism probe from layer 2 and 3 of the barrel cortex in freely moving mice.  
252 GCaMP6f was expressed in layer 2/3 neurons using AAV, and signals were imaged  
253 continuously over 5min when the mouse freely explored its environment. Following the  
254 general pipeline of MIN1PIPE (Online Methods), our method removed the strong uneven  
255 background structure, and automatically identified 210 putative ROI components without  
256 the need for additional manual selection (Fig. 3a, Supplementary Video S5). In comparison,  
257 PCA/ICA identified 79 ROIs whereas CNMF identified 71 ROIs. Note that with the same  
258 computer configuration and dataset (~28 GB), the CNMF ran into memory issues and could  
259 not process the full-scale video, thus we cropped a center patch as the input video to the  
260 CNMF (Fig 3b-d middle panels). The contours of the ROIs identified by the different

261 methods are drawn and superimposed onto the max projection of the neural enhanced data  
262 (Fig. 3b). This reveals that MIN1PIPE can identify potentially all ROIs, whereas PCA/ICA  
263 and CNMF miss a significant subset of ROIs. Meanwhile, both the PCA/ICA and CNMF  
264 have some problems in separating overlapping ROIs and/or estimating the correct shape of  
265 the ROIs, as revealed by the max projections of the extracted signals (Fig. 3c). The  
266 projection of MIN1PIPE extracted signals closely resembles those of the neural enhanced  
267 data (Fig. 3c, top). In comparison, the projection obtained using PCA/ICA has low SNR  
268 with high background signals (Fig. 3c, bottom), whereas the projection derived from  
269 CNMF shows unrealistic ROI shapes larger than the true shape of neurons, indicating that  
270 the CNMF is sensitive to the contamination of the background dynamics (Fig. 3c, middle).  
271 To further check the shape of individual ROIs, we choose to visualize one example ROI  
272 embedded in the full imaging field using different methods (Fig. 3d). MIN1PIPE delineates  
273 a well localized ROI footprint, whereas CNMF returns a less localized ROI difficult to  
274 relate to the underlying neuron. PCA/ICA, on the other hand, fails to provide a localized  
275 footprint as remnants of other ROI components can also be seen. To examine the temporal  
276 traces extracted by the different methods, we selected 10 ROI components that were  
277 identified by all three methods within the cropped image field and plotted their  
278 corresponding calcium traces (Fig 3e, individual panels marked with 1-10). Again, the  
279 spatial footprints of the 10 ROIs obtained through CNMF and PCA/ICA are less localized  
280 as described above. In terms of calcium dynamics, both MIN1PIPE and CNMF give  
281 denoised traces, whereas the traces obtained using PCA/ICA are noisy and show unrealistic  
282 negative fluctuations. Furthermore, the traces extracted using CNMF include false positive  
283 calcium events that likely reflect background noises (arrows in Fig. 3e). Supplementary

284 Video S6 shows the comparison of raw and processed results using three different methods  
285 of the entire imaging video.

286 To further illustrate the general applicability of MIN1PIPE in processing miniscope  
287 imaging data obtained over different brain areas and/or different animal models, we applied  
288 it to process calcium imaging results from Area X in zebra finch and compared the results  
289 with those obtained using the other two methods. Briefly, MIN1PIPE detected 55 ROI  
290 components, whereas CNMF detected 15 and PCA/ICA detected 35 ROIs after manual  
291 selection (Fig. 4a-b, Supplementary Video S7). Again, CNMF could only process a  
292 cropped portion of the imaging video due to the computer memory issues. All of the ROIs  
293 detected by CNMF and PCA/ICA are included in the set extracted by MIN1PIPE. In  
294 addition to false negatives, CNMF also identifies a cluster of false positive ROIs that are  
295 apparent upon visual inspections (Fig. 4b-c, e). The PCA/ICA again gives rise to  
296 nonlocalized ROI footprints that contain other potential components (Fig. 4d). It was  
297 known that Area X neurons show strong song selective activities when the bird is singing  
298 (Goldberg and Fee, 2010; Kojima and Doupe, 2007; Woolley et al., 2014; Yazaki-  
299 Sugiyama and Mooney, 2004), which can be used as partial ground truth to validate  
300 MIN1PIPE. We plot the calcium traces of the ROIs identified by MIN1PIPE, and the  
301 majority of the ROIs contain calcium events that are roughly phase-locked to the singing  
302 onsets (Fig. 4f). Notably, a subset of the neurons shows precise singing-related activities  
303 with minimal events unrelated to singing (Fig. 4g upper panel). Furthermore, we sorted  
304 neurons according to their timing of peak calcium activities during each song production  
305 event (Fig. 4g lower panel), and this analysis also reveals a subset of Area X neurons whose

306 activation patterns are closely related to the onset of the singing, consistent with previous  
307 findings.

308 We also did studies (Supplementary Fig. S7-S8) showing the effectiveness of the two  
309 modules (neural enhancing and seeds-cleansed signal extraction) when combined  
310 separately with previous methods to improve the performance. Finally, we compare our  
311 method with the CNMF-E method (Zhou et al., 2016) (Supplementary Fig. S9).

## 312 **DISCUSSION**

313 The key advances that set MIN1PIPE apart from the previous imaging processing methods  
314 are the following. First, MIN1PIPE solves the full range of problems for signal extraction  
315 in single-photon miniscope imaging with one pipeline. Specifically, we have developed  
316 innovative and robust modules to solve different problems including: the neural enhancing  
317 module that uses a novel algorithm to remove the ultra-high and fluctuating background  
318 characteristic of single photon imaging, the novel hierarchical movement correction  
319 module that is capable of efficiently registering any types of deformations of the imaging  
320 field, and the seeds-cleansed neural signal extraction module that utilizes GMM and  
321 pretrained RNN to enable automatic identification and extraction of ROIs and calcium  
322 traces. Second, MIN1PIPE eliminates the need for heuristically setting many parameters  
323 that are not only unknown *a priori*, but also influence the performance of the downstream  
324 processing steps, such as setting the number of neurons, a central parameter required by all  
325 previous neural signal extraction methods. The importance of this should not be neglected,  
326 because pre-setting unknown parameters can become problematic in practice. For example,  
327 overestimating the number of neurons may result in false positives in identified ROIs  
328 before the calcium trace extraction step, and also result in the unnecessary consumption of

329 computing time. These false positives can only be removed with laborious manual selection  
330 without a robust seeds-cleansing step. On the other hand, underestimating the number of  
331 neurons will likely lead to false negatives that can never be identified by the downstream  
332 steps. Therefore, tweaking this parameter is inevitable in practice using previous methods.  
333 While we do not claim that MIN1PIPE completely eliminates the need for manually  
334 pruning identified ROIs, our method does only involve minimal manual interference. Third,  
335 MIN1PIPE contains a minimal set of parameters that are easy to interpret and error-tolerant  
336 (Online Methods). These include a set of simplified and fixed parameters applicable to  
337 various conditions of the popular miniscope platforms (*e.g.* Inscopix nVista, UCLA open-  
338 source miniscope) in our brick algorithm. In addition, all modules use definitive criteria  
339 independent of various imaging datasets, which ensures the robustness that the previous  
340 combination of setting the number of neurons and the serial initialization procedure could  
341 not provide.

342 In summary, MIN1PIPE provides a generally applicable high-performance toolbox with  
343 the modular framework to handle and process miniscope imaging data. Interesting future  
344 works may integrate more advanced methods to further improve the precision, such as  
345 stricter choices of the kernel of anisotropic diffusion (Chen et al., 2011; Tsitsios and  
346 Petrou, 2013), considering spectral invariants to handle very large deformations during  
347 non-rigid registration (Lombaert et al., 2014), and using more biologically valid calcium  
348 dynamics deconvolution methods (Speiser et al., 2017). Additionally, a more robust RNN  
349 classifier for seeds cleansing can be trained with more available datasets.



350 **ACKNOWLEDGEMENT**

351 We thank the suggestions and comments from members of the Wang Lab and Mooney Lab  
352 at Duke University. The study is supported by NIH grants DP1-MH103908, R21NS101441,  
353 NS077986 to F.W.

354 **AUTHOR CONTRIBUTIONS**

355 J.L. and F.W. conceived and designed the project; J.L. designed and implemented all  
356 modules of MIN1PIPE; C.L. designed the RNN classifier; J.L. generated the synthetic data;  
357 J.L., F.W., J.S.-A., R.M., Z.Z. and F.F. designed and/or conducted in vivo imaging  
358 experiments; J.L. and C.L. analyzed the data; J.L., C.L., F.W. wrote the manuscript.

359 **REFERENCES**

- 360 Apthorpe, N., Riordan, A., Aguilar, R., Homann, J., Gu, Y., Tank, D. and Seung, H.S.  
361 (2016). Automatic neuron detection in calcium imaging data using convolutional networks.  
362 In *Proc. Advances in Neural Information Processing Systems*. 29, 3270-3278.
- 363 Berdyeva, T.K., Frady, E.P., Nassi, J.J., Aluisio, L., Cherkas, Y., Otte, S., Wyatt, R.M.,  
364 Dugovic, C., Ghosh, K.K., Schnitzer, M.J., et al. (2016). Direct Imaging of Hippocampal  
365 Epileptiform Calcium Motifs Following Kainic Acid Administration in Freely Behaving  
366 Mice. *Front. Neurosci.* 10, 53.
- 367 Betley, J.N., Xu, S., Cao, Z.F.H., Gong, R., Magnus, C.J., Yu, Y. and Sternson, S.M. (2015).  
368 Neurons for hunger and thirst transmit a negative-valence teaching signal. *Nature* 521,  
369 180-185.
- 370 Cai, D.J., Aharoni, D., Shuman, T., Shobe, J., Biane, J., Song, W., Wei, B., Veshkini, M.,  
371 La-Vu, M., Lou, J., et al. (2016). A shared neural ensemble links distinct contextual  
372 memories encoded close in time. *Nature* 534, 115-118.
- 373 Chen, D., MacLachlan, S. and Kilmer, M. (2011). Iterative parameter-choice and multigrid  
374 methods for anisotropic diffusion denoising. *SIAM J. Sci. Comput.* 33, 2972-2994.
- 375 Cho, K., Van Merriënboer, B., Gulcehre, C., Bahdanau, D., Bougares, F., Schwenk, H. and  
376 Bengio, Y. (2014). Learning phrase representations using RNN encoder-decoder for  
377 statistical machine translation. In *Proc. Conference on Empirical Methods in Natural*  
378 *Language Processing*, 1724-1734.

- 379 Cox, J., Pinto, L. and Dan, Y. (2016). Calcium imaging of sleep–wake related neuronal  
380 activity in the dorsal pons. *Nat. Commun.* 7, 10763.
- 381 Ding, C.H., Li, T. and Jordan, M.I. (2010). Convex and semi-nonnegative matrix  
382 factorizations. *IEEE Trans. Pattern Analysis and Machine Intelligence* 32, 45-55.
- 383 Dombek, D.A., Khabbaz, A.N., Collman, F., Adelman, T.L. and Tank, D.W. (2007).  
384 Imaging large-scale neural activity with cellular resolution in awake, mobile  
385 mice. *Neuron* 56, 43-57.
- 386 Douglass, A.M., Kucukdereli, H., Ponsérre, M., Markovic, M., Gründemann, J., Strobel,  
387 C., Morales, P.L.A., Conzelmann, K.K., Lüthi, A. and Klein, R. (2017). Central amygdala  
388 circuits modulate food consumption through a positive valence mechanism. *bioRxiv*,  
389 145375.
- 390 Dubbs, A., Guevara, J. and Yuste, R. (2016). moco: Fast motion correction for calcium  
391 imaging. *Front. Neuroinform.* 10, 6.
- 392 Efron, B., Hastie, T., Johnstone, I. and Tibshirani, R. (2004). Least angle regression. *Ann.*  
393 *Stat.* 32, 407-499.
- 394 Flusberg, B.A., Nimmerjahn, A., Cocker, E.D., Mukamel, E.A., Barretto, R.P., Ko, T.H.,  
395 Burns, L.D., Jung, J.C. and Schnitzer, M.J. (2008). High-speed, miniaturized fluorescence  
396 microscopy in freely moving mice. *Nat. Methods* 5, 935.
- 397 Ghosh, K.K., Burns, L.D., Cocker, E.D., Nimmerjahn, A., Ziv, Y., El Gamal, A. and  
398 Schnitzer, M.J. (2011). Miniaturized integration of a fluorescence microscope. *Nat.*  
399 *Methods* 8, 871-878.

- 400 Goldberg, J. H., and Fee, M. S. (2010). Singing-related neural activity distinguishes four  
401 classes of putative striatal neurons in the songbird basal ganglia. *J. Neurophysiol.* *103*,  
402 2002-2014.
- 403 Greenberg, D.S. and Kerr, J.N. (2009). Automated correction of fast motion artifacts for  
404 two-photon imaging of awake animals. *J. Neurosci. Methods* *176*, 1-15.
- 405 Grewe, B.F., Gründemann, J., Kitch, L.J., Lecoq, J.A., Parker, J.G., Marshall, J.D., Larkin,  
406 M.C., Jercog, P.E., Grenier, F., Li, J.Z., et al. (2017). Neural ensemble dynamics  
407 underlying a long-term associative memory. *Nature* *543*, 670-675.
- 408 Hahn, T.T., Sakmann, B. and Mehta, M.R. (2006). Phase-locking of hippocampal  
409 interneurons' membrane potential to neocortical up-down states. *Nat. Neurosci* *9*, 1359-  
410 1361.
- 411 Hochreiter, S. and Schmidhuber, J. (1997). Long short-term memory. *Neural Comput.* *9*,  
412 1735-1780.
- 413 Jennings, J.H., Ung, R.L., Resendez, S.L., Stamatakis, A.M., Taylor, J.G., Huang, J.,  
414 Veleta, K., Kantak, P.A., Aita, M., Shilling-Scriver, K., et al. (2015). Visualizing  
415 hypothalamic network dynamics for appetitive and consummatory behaviors. *Cell* *160*,  
416 516-527.
- 417 Kaifosh, P., Lovett-Barron, M., Turi, G.F., Reardon, T.R. and Losonczy, A. (2013). Septo-  
418 hippocampal GABAergic signaling across multiple modalities in awake mice. *Nat.*  
419 *Neurosci.* *16*, 1182-1184.

- 420 Kaifosh, P., Zaremba, J.D., Danielson, N.B. and Losonczy, A. (2014). SIMA: Python  
421 software for analysis of dynamic fluorescence imaging data. *Front. Neuroinform.* 8, 80.
- 422 Kamigaki, T. and Dan, Y. (2017). Delay activity of specific prefrontal interneuron subtypes  
423 modulates memory-guided behavior. *Nat. Neurosci.* 20, 854-863.
- 424 Kitamura, T., Ogawa, S.K., Roy, D.S., Okuyama, T., Morrissey, M.D., Smith, L.M.,  
425 Redondo, R.L. and Tonegawa, S. (2017). Engrams and circuits crucial for systems  
426 consolidation of a memory. *Science* 356, 73-78.
- 427 Klaus, A., Martins, G.J., Paixao, V.B., Zhou, P., Paninski, L. and Costa, R.M. (2017). The  
428 spatiotemporal organization of the striatum encodes action space. *Neuron* 95, 1171-1180.
- 429 Kojima, S. and Doupe, A.J. (2007). Song selectivity in the pallial-basal ganglia song circuit  
430 of zebra finches raised without tutor song exposure. *J. Neurophysiol.* 98, 2099-2109.
- 431 LeCun, Y., Bengio, Y. and Hinton, G. (2015). Deep learning. *Nature* 521, 436-444.
- 432 Lombaert, H., Grady, L., Pennec, X., Ayache, N. and Cheriet, F. (2014). Spectral log-  
433 demons: diffeomorphic image registration with very large deformations. *Int. J. Comput.*  
434 *Vis.* 107, 254-271.
- 435 Lucas, B.D. and Kanade, T. (1981). An iterative image registration technique with an  
436 application to stereo vision. In *Proc. 7th International Joint Conference on Artificial*  
437 *Intelligence*, 674-679.
- 438 Markowitz, J.E., Liberti III, W.A., Guitchounts, G., Velho, T., Lois, C. and Gardner, T.J.  
439 (2015). Mesoscopic patterns of neural activity support songbird cortical sequences. *PLoS*  
440 *Biol.* 13, e1002158.

- 441 Maruyama, R., Maeda, K., Moroda, H., Kato, I., Inoue, M., Miyakawa, H. and Aonishi, T.  
442 (2014). Detecting cells using non-negative matrix factorization on calcium imaging  
443 data. *Neural Networks* 55, 11-19.
- 444 Mukamel, E.A., Nimmerjahn, A. and Schnitzer, M.J. (2009). Automated analysis of  
445 cellular signals from large-scale calcium imaging data. *Neuron* 63, 747-760.
- 446 Okuyama, T., Kitamura, T., Roy, D.S., Itohara, S. and Tonegawa, S. (2016). Ventral CA1  
447 neurons store social memory. *Science* 353, 1536-1541.
- 448 Pachitariu, M., Packer, A.M., Pettit, N., Dalgleish, H., Hausser, M. and Sahani, M. (2013).  
449 Extracting regions of interest from biological images with convolutional sparse block  
450 coding. In *Proc. Advances in Neural Information Processing Systems* 26, 1745-1753.
- 451 Pachitariu, M., Stringer, C., Schröder, S., Dipoppa, M., Rossi, L.F., Carandini, M. and  
452 Harris, K.D. (2016). Suite2p: beyond 10,000 neurons with standard two-photon  
453 microscopy. *bioRxiv*, 061507.
- 454 Perona, P. and Malik, J. (1990). Scale-space and edge detection using anisotropic  
455 diffusion. In *IEEE Trans. Pattern Analysis and Machine Intelligence* 12, 629-639.
- 456 Pinto, L. and Dan, Y. (2015). Cell-type-specific activity in prefrontal cortex during goal-  
457 directed behavior. *Neuron* 87, 437-450.
- 458 Pnevmatikakis, E.A., Soudry, D., Gao, Y., Machado, T.A., Merel, J., Pfau, D., Reardon,  
459 T., Mu, Y., Lacefield, C., Yang, W., et al. (2016). Simultaneous denoising, deconvolution,  
460 and demixing of calcium imaging data. *Neuron* 89, 285-299.

461 Poyraz, F.C., Holzner, E., Bailey, M.R., Meszaros, J., Kenney, L., Kheirbek, M.A., Balsam,  
462 P.D. and Kellendonk, C. (2016). Decreasing striatopallidal pathway function enhances  
463 motivation by energizing the initiation of goal-directed action. *J. Neurosci.* 36, 5988-6001.

464 Reidl, J., Starke, J., Omer, D.B., Grinvald, A. and Spors, H. (2007). Independent  
465 component analysis of high-resolution imaging data identifies distinct functional  
466 domains. *Neuroimage* 34, 94-108.

467 Roberts, T.F., Hisey, E., Tanaka, M., Kearney, M.G., Chattree, G., Yang, C.F., Shah, N.M.  
468 and Mooney, R. (2017). Identification of a motor-to-auditory pathway important for vocal  
469 learning. *Nat. Neurosci.* 20, 978-986.

470 Roy, D.S., Kitamura, T., Okuyama, T., Ogawa, S.K., Sun, C., Obata, Y., Yoshiki, A. and  
471 Tonegawa, S. (2017). Distinct neural circuits for the formation and retrieval of episodic  
472 memories. *Cell* 170, 1000-1012.

473 Serra, J. and Vincent, L. (1992). An overview of morphological filtering. *Circuits, Systems,*  
474 *and Signal Processing* 11, 47-108.

475 Shi, J. and Tomasi, C. (1994). Good features to track. *IEEE Conference on Computer*  
476 *Vision and Pattern Recognition*, 593-600.

477 Speiser, A., Yan, J., Archer, E.W., Buesing, L., Turaga, S.C. and Macke, J.H. (2017).  
478 Fast amortized inference of neural activity from calcium imaging data with variational  
479 autoencoders. In *Proc. Advances in Neural Information Processing Systems* 30, 4027-  
480 4037.

- 481 Thévenaz, P., Ruttimann, U.E. and Unser, M. (1998). A pyramid approach to subpixel  
482 registration based on intensity. *IEEE Trans. Image Processing* 7, 27-41.
- 483 Tsotsios, C. and Petrou, M. (2013). On the choice of the parameters for anisotropic  
484 diffusion in image processing. *Pattern Recognition* 46, 1369-1381.
- 485 Van Den Boomgaard, R. and Van Balen, R. (1992). Methods for fast morphological image  
486 transforms using bitmapped binary images. *CVGIP: Graphical Models and Image*  
487 *Processing* 54, 252-258.
- 488 Vercauteren, T., Pennec, X., Perchant, A. and Ayache, N. (2009). Diffeomorphic demons:  
489 Efficient non-parametric image registration. *Neuroimage* 45, 61-72.
- 490 Weber, F. and Dan, Y. (2016). Circuit-based interrogation of sleep control. *Nature* 538,  
491 51-59.
- 492 Woolley, S. C., Rajan, R., Joshua, M., and Doupe, A. J. (2014). Emergence of context-  
493 dependent variability across a basal ganglia network. *Neuron* 82, 208-223.
- 494 Xu, C., Krabbe, S., Gründemann, J., Botta, P., Fadok, J.P., Osakada, F., Saur, D., Grewe,  
495 B.F., Schnitzer, M.J., Callaway, E.M., et al. (2016). Distinct hippocampal pathways  
496 mediate dissociable roles of context in memory retrieval. *Cell* 167, 961-972.
- 497 Yazaki-Sugiyama, Y. and Mooney, R. (2004). Sequential learning from multiple tutors and  
498 serial retuning of auditory neurons in a brain area important to birdsong learning. *J.*  
499 *Neurophysiol.* 92, 2771-2788.



500 Zhou, P., Resendez, S.L., Stuber, G.D., Kass, R.E. and Paninski, L. (2016). Efficient and  
501 accurate extraction of in vivo calcium signals from microendoscopic video data. *arXiv*,  
502 1605.07266.

503 Ziv, Y., Burns, L.D., Cocker, E.D., Hamel, E.O., Ghosh, K.K., Kitch, L.J., El Gamal, A.  
504 and Schnitzer, M.J. (2013). Long-term dynamics of CA1 hippocampal place codes. *Nat.*  
505 *Neurosci.* 16, 264-266.

506 Figure 1

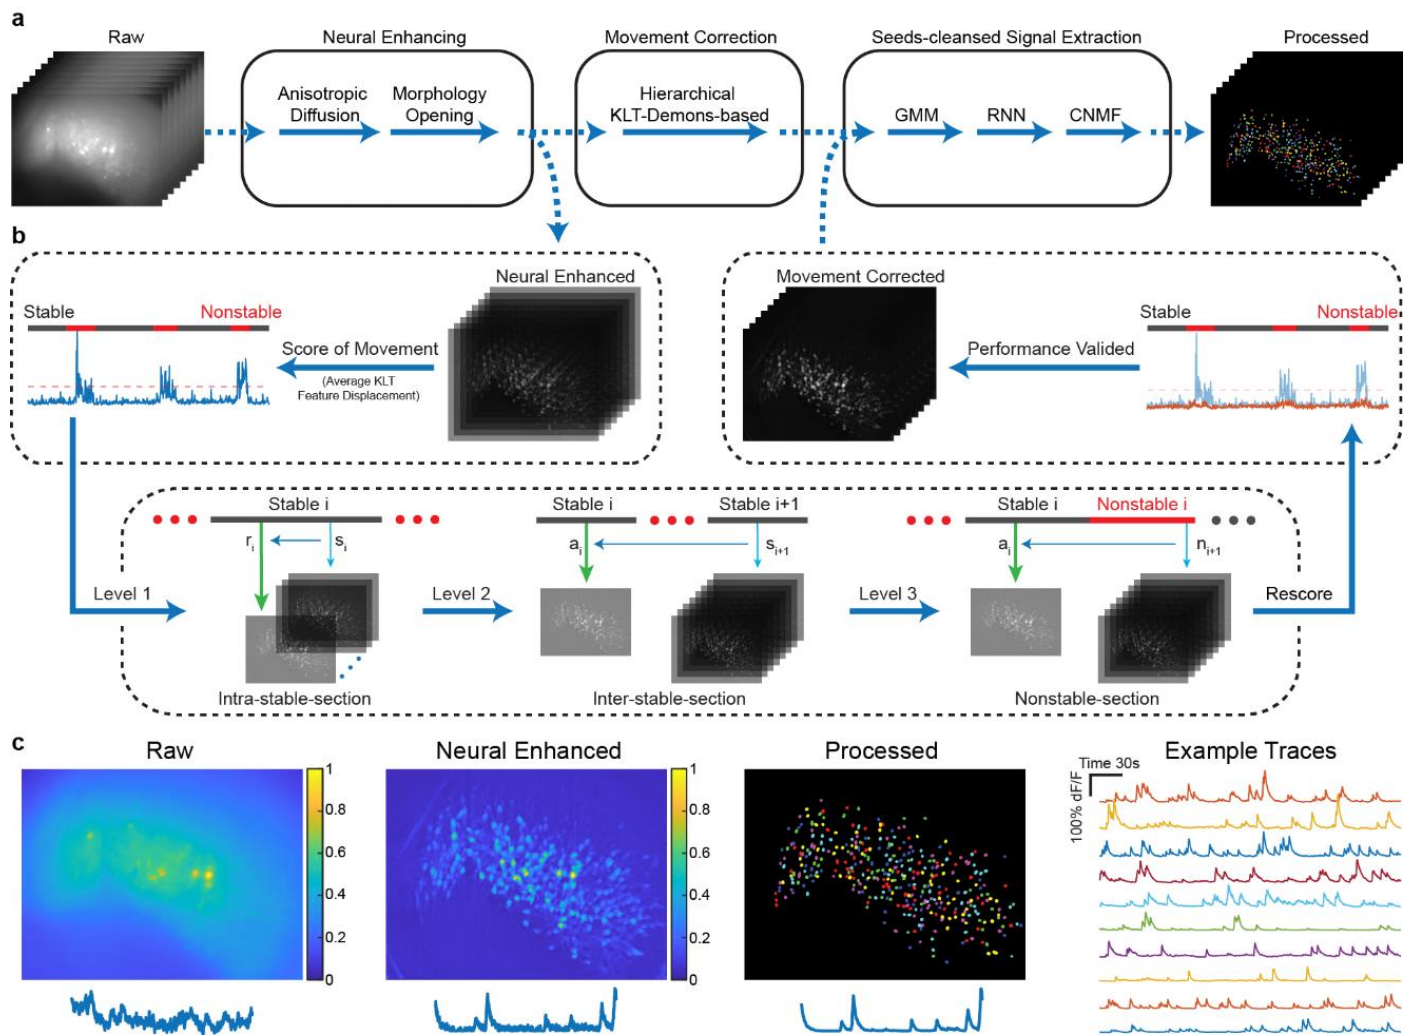

507

508 **Fig. 1.** The general pipeline and demonstrations of MIN1PIPE. **a.** The overall structure of  
 509 MIN1PIPE. MIN1PIPE takes the very raw miniscope imaging data freshly collected from  
 510 the imaging system as inputs, and returns fully processed ROI components with spatial  
 511 footprints and temporal calcium traces as outputs. The data are processed in series by neural  
 512 enhancing, hierarchical movement correction, and seeds-cleansed signal extraction  
 513 modules. Each module is composed of specific brick functions. **b.** A zoom-in of the  
 514 hierarchical movement correction module. The module is KLT-Log Demons based. It first  
 515 scores all the neural enhanced frames and divides them into stable and nonstable sections,

516 then register frames at three different levels. The movement corrected frames are then fed  
517 into the seeds-cleansed neural signal extraction module. **c.** The max projecting  
518 demonstrations of MIN1PIPE. The raw imaging video contains large, dominant  
519 background fluctuation, the neural enhanced video contains mainly neural signals, and the  
520 fully processed video contains only extracted and denoised neural signals as independent  
521 ROI components. Example traces are randomly selected from the processed video. See also  
522 Fig. S1-S4.

523 Figure 2

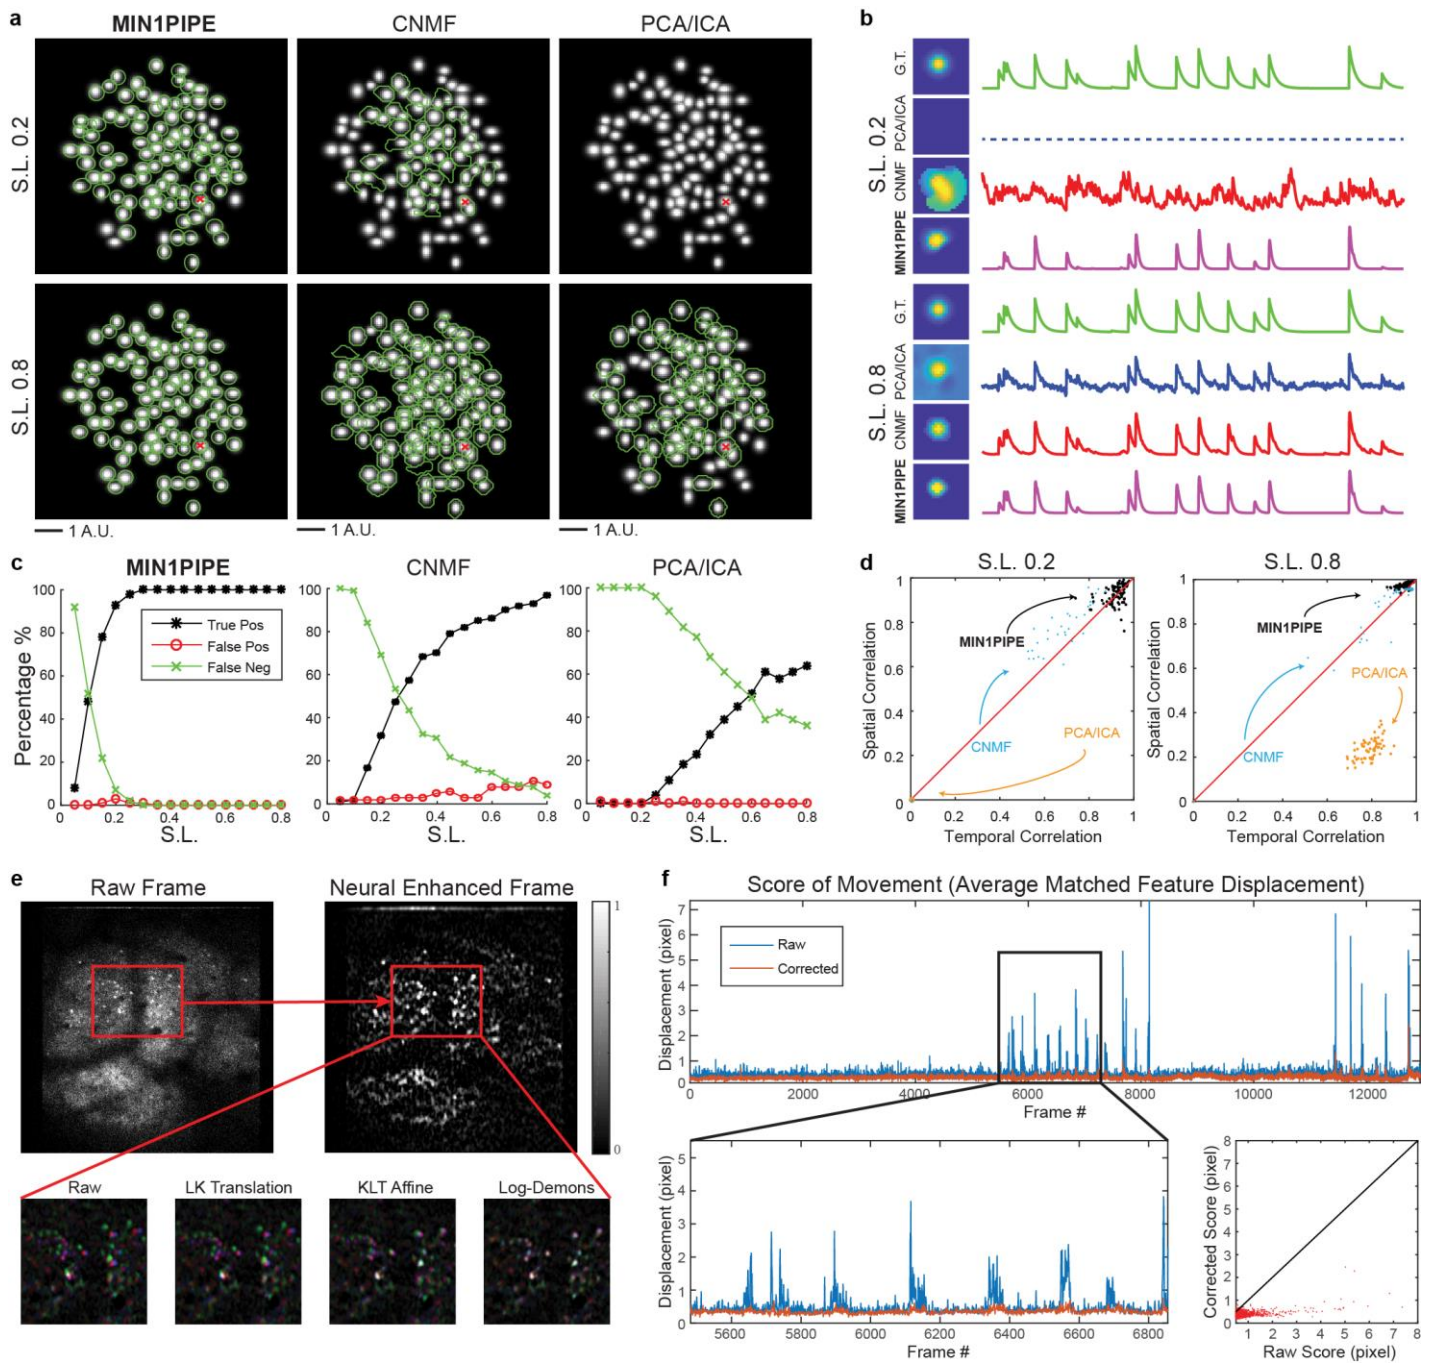

524

525 **Fig. 2.** Quantification of MIN1PIPE. **a-d.** The quantitative performance comparison  
 526 between MIN1PIPE and the other methods on simulated datasets. **a.** The identified ROI  
 527 contours of the three methods at two representative signal levels. S.L.: signal level (the

528 ratio of the amplitude between the signals and the background). A.U.: arbitrary unit. **b.** The  
529 trace of an example ROI component identified by the three methods and the ground truth.  
530 G.T.: ground truth. **c.** The identification precision and accuracy of the three methods. **d.**  
531 The spatiotemporal identification accuracy with the three methods at two representative  
532 signal levels. The similarity of the spatial footprints and temporal traces between the results  
533 of the three methods and the ground truth of each ROI is plotted as a dot in the figure.  
534 These quantifications confirm that MIN1PIPE not only outperforms the other two methods  
535 in all aspects, but also verify that MIN1PIPE can provide satisfactory neural signal  
536 extraction results of miniscope imaging data. **e-f.** The quantification of the movement  
537 correction module. **e.** The demonstration of various image registration methods in a  
538 consecutive three frames from two-photon imaging data. The deformation registration  
539 algorithm we use in the module (Log-Demons) successfully corrects all the nonrigid  
540 deformations within the frames that cannot be corrected by the methods that assume  
541 translation or rigid transformation. The black and white color indicate overlapping of the  
542 same structure between the frames, whereas other colors indicate nonaligned structures. **f.**  
543 The score of movement before and after the correction. In general, the hierarchical  
544 correction steps register large deformations while preserves the stable frames. See also Fig.  
545 S5-S9.

546 Figure 3

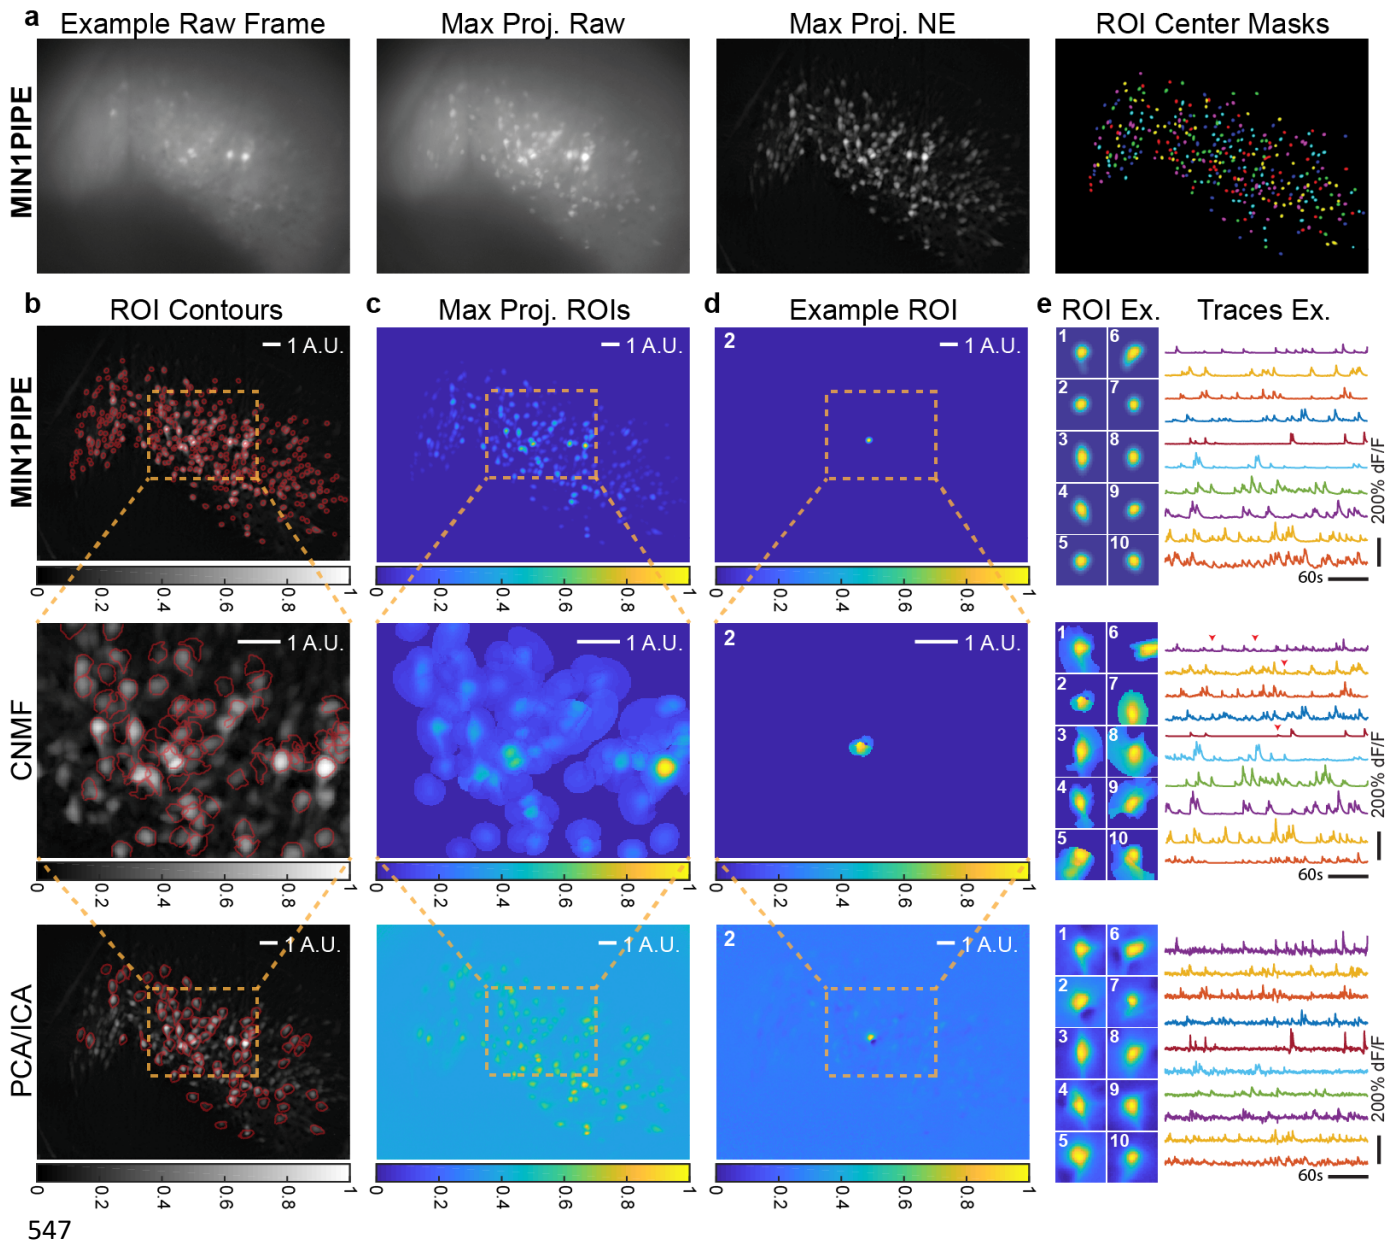

547

548 **Fig. 3.** Comparing different methods using miniscope imaging data from the mouse barrel  
549 cortex. **a.** Demo of MIN1PIPE in processing imaging data from the barrel cortex. We show  
550 an example raw frame, the max projection of raw video, the max projection of the neural  
551 enhanced video, and the colored ROI masks. **b.** The identified ROI contours superimposed  
552 on the max projection of neural enhanced video. MIN1PIPE returns a set of ROIs with

553 well-shaped, localized spatial footprints. CNMF and PCA/ICA identify only a small subset  
554 of true positives (71 and 79 respectively), and either the footprints are not localized, or the  
555 run into memory issues. The projection map is shown in grayscale colormap. **c.** The max  
556 projections of all identified ROI footprints. This further demonstrates the general properties  
557 of the extracted neural components. **d.** The spatial footprint of an example ROI. MIN1PIPE  
558 extracted the most localized component that is close to the real shape shown in the neural  
559 enhanced projection, whereas CNMF detected the noise-sensitive result and PCA/ICA  
560 detected the unrealistic component as a mix of several other components. **e.** The temporal  
561 traces of ten examples randomly selected from the ROIs that are detected by all three  
562 methods. A similar conclusion can be drawn in spatial footprints, whereas MIN1PIPE  
563 shows the best performance in temporal trace extraction (some potential false positive  
564 events indicated by red arrows).

565 Figure 4

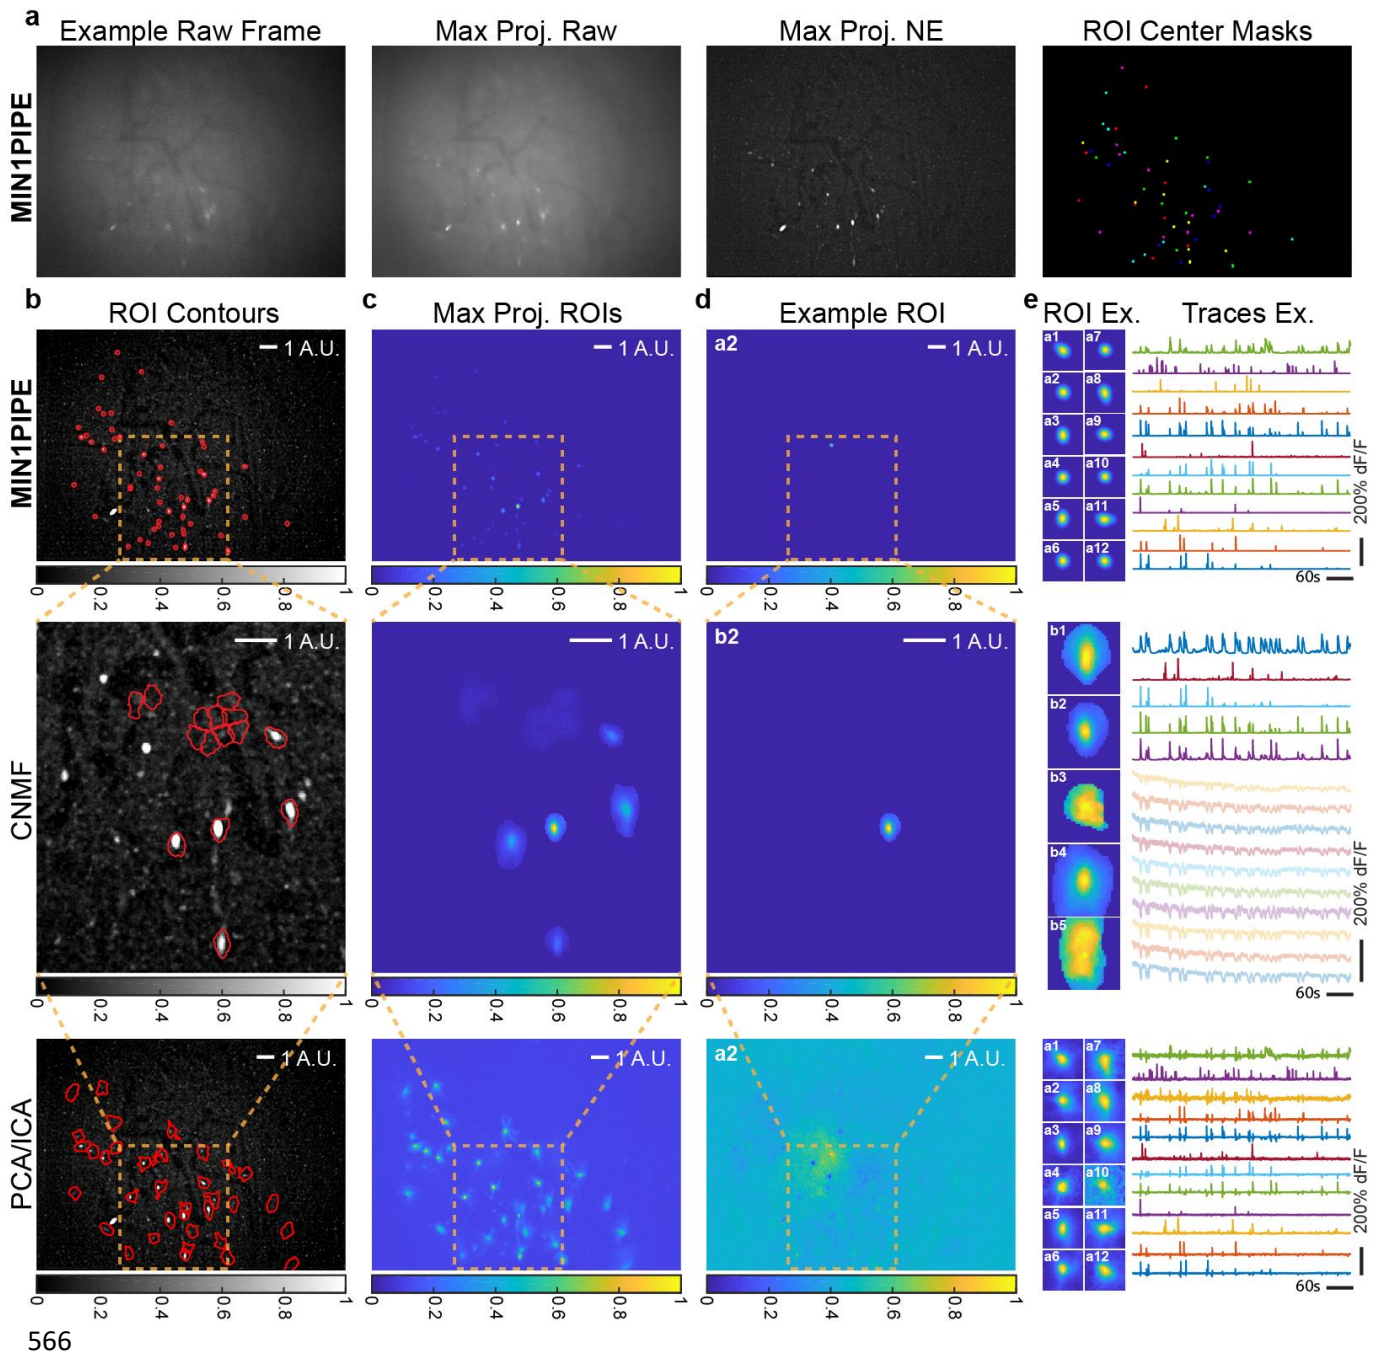

567 **Fig. 4.** Comparing different methods using miniscope imaging data from the Area X in  
568 zebra finch. **a.** Demo of MIN1PIPE in processing data from Area X in the zebra finch brain.  
569 We show an example of the raw frame, the max projection of raw video, the max projection  
570 of the neural enhanced video, and the colored ROI masks. **b.** The identified ROI contours



571 superimposed on the max projection of neural enhanced video. MIN1PIPE returns a set of  
572 ROIs with well-shaped, localized spatial footprints. CNMF and PCA/ICA identify only a  
573 small subset of true positives (15 and 35 respectively), and either the footprints are not  
574 localized, or the processes run into memory issues. The projection map is shown in  
575 grayscale colormap. **c.** The max projections of all the identified ROI footprints. **d.** The  
576 spatial footprint of an example ROI. MIN1PIPE extracted the most localized component  
577 that is close to the real shape shown in the neural enhanced projection, whereas PCA/ICA  
578 extracted the unrealistic component as a mix of several other components. CNMF on the  
579 other hand, did not detect this ROI. **e.** The temporal traces of twelve examples selected  
580 from the ROIs detected by both MIN1PIPE and PCA/ICA. A similar conclusion can be  
581 drawn in spatial footprints, whereas MIN1PIPE shows the best performance of temporal  
582 trace extraction. Faded traces in CNMF indicate the traces of the false positives.

583 Figure 5

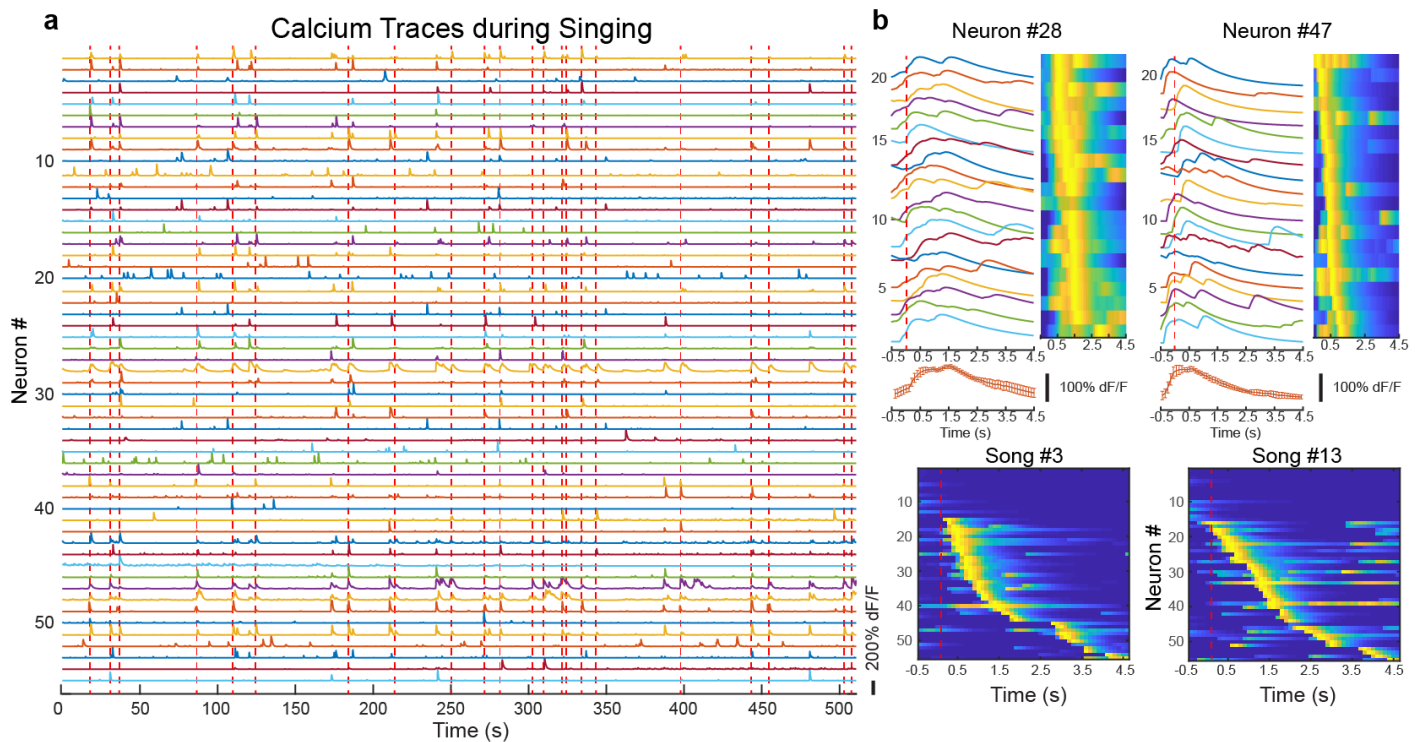

584

585 **Fig. 5.** Analysis of neural correlation in Area X of zebra finch to singing behavior. **a.** The  
586 traces of all automatically detected ROIs with MIN1PIPE superimposed with complete  
587 singing onsets in red dashed lines. Note that incomplete song events are not labeled and  
588 taken into analysis. **b.** Upper panel: two example neurons with precise song selectivity.  
589 The traces represent the neuronal activity of the first 20 complete song singing events with  
590 a window of 0.5 second before and 4.5 seconds after the song onset. The heatmap is another  
591 way of visualizing the analysis. The error bar graphs at the bottom show the trial average  
592 traces of the two neurons. Lower panel: population activity pattern of two example song  
593 singing events. The neurons are sorted to the latency of the peak. Red dashed lines indicate  
594 the onset of songs.

## 595 ONLINE METHODS

596 **NEURAL ENHANCING** The neural enhancing module contains two steps of framewise  
597 operations. We denote  $\mathbf{X} \in \mathbb{R}^{P \times T}$  ( $P$  is number of pixels per frame, and  $T$  is number of  
598 frames) as the raw video after converting each two dimensional frame into a vector, and  
599  $\mathbf{I} \in \mathbb{R}^{M \times J}$  ( $M$  and  $J$  are the height and width of a frame respectively) as a frame before  
600 vectorization.

601 **Denoising** To first remove the spatial noise embedded in each frame introduced by the  
602 photoelectric process of the sensor, we apply denoising operation on each frame  $\mathbf{I}$  using  
603 anisotropic diffusion [36]. For a given diffusion time  $\tau$ , the evolution follows the equation  
604  $\frac{\partial \mathbf{I}}{\partial \tau} = \text{div}(\mathbf{C} \nabla \mathbf{I}) \triangleq \nabla \mathbf{C} \cdot \nabla \mathbf{I} + \mathbf{C} \Delta \mathbf{I}$  where  $\mathbf{C}$  is the diffusive coefficient matrix depending  
605 on pixels and  $\tau$ . By choosing concrete form of  $\mathbf{C}$  and  $\tau$ , we can control the smoothing  
606 level along or perpendicular to the boundaries between neurons and the background. Due  
607 to the simple structures in the cleaned imaging field, we choose the classical Perona-Malik  
608 filter  $\mathbf{C} = \exp\left(-\frac{\|\nabla \mathbf{I}\|^2}{\kappa^2}\right)$ , where  $\kappa$  controls the threshold of high-contrast. The diffusivity is  
609 selected to preferentially smooth high-contrast regions, and  $\kappa$  and  $\tau$  are chosen to allow high  
610 tolerance. We use  $\kappa = 0.5$  and  $\tau = 0.5$  with a step size  $\delta t = 0.05$  as the default parameters  
611 in anisotropic diffusion. The output image  $\mathbf{I}^s$  contains reduced spatial noise while preserves  
612 the boundary information of ROIs.

613 **Background Removal** Based on the observation that neuronal ROIs are small in size  
614 compared to background structures, the gray-scale morphological opening operator with a  
615 binary structuring element matrix  $\Phi$  can well estimate the background  $\mathbf{B}$  from the frame  
616  $\mathbf{I}$  adaptively. The opening operator is the combination of erosion  $\ominus$  and dilation  $\oplus$ :  $\mathbf{B} =$   
617  $(\mathbf{I} \ominus \Phi) \oplus \Phi$  (Van Den Boomgaard and Van Balen, 1992), where the morphological erosion  
618 returns minimum value  $(\mathbf{I} \ominus \Phi)(x, y) = \min_{(s,t) \in \Phi} \{\mathbf{I}(x + s, y + t)\}$  and dilation returns

619 maximum value  $(\mathbf{I} \oplus \Phi)(x, y) = \max_{(s,t) \in \Phi} \{\mathbf{I}(x + s, y + t)\}$  within the same structuring  
620 window at each point. In practice, the choice of the structuring element should be comparable  
621 to the overall size of the neurons in the imaging field. We choose the structuring element  
622 to be of disk shape with a default size of 9 (pixels). The foreground is then computed as:  
623  $\mathbf{I}^f = \mathbf{I} - \mathbf{B}$ . After the dynamic background removal,  $\mathbf{I}^f$  contains only neuronal information  
624 with minimal background noise corruption.

625 **MOVEMENT CORRECTION** The movement correction module performs a hierarchi-  
626 cal registration framework over the frames of the imaging video. The neural enhanced video  
627 is first scored with a measuring metric on the relative displacement between two neighboring  
628 frames. The video is then segmented into stable or nonstable sections based on the score,  
629 followed by three levels of registration: the intra-stable-section, inter-stable-section and  
630 nonstable-section registration.

631 **Scoring Metric** We track features containing corner information of every two neighboring  
632 frames using the KLT tracker, and then calculate the average displacement of these features.  
633 The KLT tracker first selects good features to track, where the feature points contains enough  
634 information on both directions within the neighborhood  $p$ . The problem can be formulated  
635 as  $\nabla p = 0$  over the neighborhood. A good feature point is selected if the smaller eigenvalue  
636  $\sigma_{min} \geq \sigma_0$  and the *condition number*  $\kappa = \frac{\sigma_{max}}{\sigma_{min}} \leq \kappa_{max}$ . Then the algorithm tracks the  
637 feature points based on Newton-Raphson minimization on the normal equation:

$$\mathbf{A} \mathbf{s} = \mathbf{b}$$

638 where

$$\mathbf{A} = \sum_{\mathbf{x}} \nabla \mathbf{J}_t^f(\mathbf{x}) \nabla \mathbf{J}_t^f(\mathbf{x})^\top \omega(\mathbf{x} - \mathbf{x}_{\mathbf{I}_t^f}) \quad \text{and} \quad \mathbf{b} = \sum_{\mathbf{x}} \nabla \mathbf{J}_t^f(\mathbf{x}) [\mathbf{I}_t^f(\mathbf{x}) - \mathbf{J}_t^f(\mathbf{x})]^\top \omega(\mathbf{x} - \mathbf{x}_{\mathbf{I}_t^f})$$

639  $J_t^f$  and  $I_t^f$  are the moving and fixed frame of the  $t$ th registration pair after neural enhancing  
640 respectively (in this case,  $J_t^f = I_{t+1}^f$ ), and  $\omega(\mathbf{x})$  is the window of the neighborhood. For the  
641 scoring, we choose 31 pixels as the default window size of the neighborhood. To segment  
642 the frames into stable/nonstable sections, we compute the minimum value between the 3  
643 times of median absolute deviation (MAD) above median and upper limit threshold (0.5  
644 pixel as default) to be the threshold of segmentation. Any frame whose score is above  
645 the threshold is considered as one belonging to some stable section. The frames that are  
646 connected together are labeled as stable sections while the remaining connected components  
647 are nonstable ones.

648 **Intra-stable-section Registration** Displacements with small magnitude or consistent  
649 directions can be approximated as translational displacement. Therefore, after the segmen-  
650 tation, movements within the stable sections can be considered translational. Within each  
651 stable section, an efficient displacement matching method with subpixel resolution is used  
652 to register the neighboring frames. Here we use a similar Lucas-Kanade tracker to track  
653 the center of the moving frames with a sufficiently large window (80% of the frame size)  
654 between two neighboring frames. However, when frame number within a section grows, the  
655 registration error may cumulate for later frames. Therefore, in practice we update the fixed  
656 frame as reference every second and all moving frames within that period are aligned to the  
657 fixed frame. This is acceptable due to the slow calcium dynamics so that the imaging field  
658 remains essentially similar within a second.

659 **Inter-stable-section Registration** The imaging field is stable within each stable section  
660 after the intra-section registration. However, the imaging fields of different stable sections  
661 are not necessarily similar. Therefore, we need to align different stable sections without  
662 specific assumptions of the movement type. We first extract the overall information of each  
663 stable section by averaging the frames with significant neuronal activation, we then sort

664 these sectional images  $\mathbf{I}_i^{\text{sec}}$  according to their similarity. To register the  $i$ th sectional image  
665 based on the sorted similarity, a reference image is generated by calculating the weights  $\hat{x}$   
666 using the least square regression between the registered frames and the current sectional  
667 image:

$$\mathbf{A}^{\text{ref}}x = \mathbf{b}^{\text{cur}}$$

668 where

$$\mathbf{A}^{\text{ref}} = (\text{vec}(\mathbf{I}_1^{\text{sec}}), \dots, \text{vec}(\mathbf{I}_{i-1}^{\text{sec}})) \quad \text{and} \quad \mathbf{b}^{\text{cur}} = \text{vec}(\mathbf{I}_i^{\text{sec}})$$

669 The reference image is then reshaped into two dimensional matrix  $\mathbf{R}_i^{\text{sec}}$  from  $\mathbf{b}^{\text{ref}} = \mathbf{A}^{\text{ref}}\hat{x}$ .  
670 Once we have the moving and fixed sectional images, we apply rigid preregistration to the  
671 moving image using similar KLT tracker. To finally correct for the nonrigid deformation, we  
672 apply the diffeomorphic Log-Demons to the preregistered image  $\hat{\mathbf{I}}_i^{\text{sec}}$  based on the reference  
673  $\mathbf{R}_i^{\text{sec}}$ . In general, the diffeomorphic Log-Demons is a non-parametric registration method,  
674 which aims at finding the displacement of all pixels by minimizing the global energy:

$$E(c, s) = \frac{1}{\sigma_i^2} \text{Sim}(\mathbf{F}, \mathbf{M} \circ c) + \frac{1}{\sigma_x^2} \text{dist}(s, c)^2 + \frac{1}{\sigma_T^2} \text{Reg}(s)$$

675 It consists of the similarity, correspondence and regularization items, where  $\mathbf{F}$  and  $\mathbf{M}$  are  
676 fixed and moving image respectively, and  $\sigma_i$ ,  $\sigma_x$  and  $\sigma_T$  account for similarity, spatial  
677 uncertainty on the correspondence and regularization level. In specific, Log-Demons  
678 represents everything in log domain. It spells out two regularizing terms, fluid and diffusion,  
679 and uses a Lie group structure to impose diffeomorphism. In our implementation, we choose  
680  $\sigma_i = \sigma_x = 1$ , and  $\sigma_{\text{fluid}} = \sigma_{\text{diffusion}} = 3$ . Because all the frames within the same stable  
681 section share the same imaging field, the deformation field of the current stable section is  
682 then applied to warp all the frames. After registering all the stable sections iteratively, all  
683 the stable frames are efficiently aligned.

684 **Nonstable-section Registration** At the third level, only nonstable sections remain to be  
685 aligned. We use a similar approach as in the inter-section registration, where we first  
686 preregister the current frame to the reference image, and then apply Log-Demons to finely  
687 align the frame. Similarly, the reference image is computed based on some of the registered  
688 frames. For the  $i$ th nonstable section, this set of frames includes the last frame of the  $i$ th  
689 stable section, the first frame of the  $i + 1$ th stable section, and the frames that have already  
690 been registered in the  $i$ th nonstable section.

691 **SEEDS-CLEANSSED SIGNAL EXTRACTION** We generate and cleanse the potential  
692 seeds of ROIs in this section, and create the initial spatial regions and the time series of  
693 ROIs for later refinement of the spatiotemporal signals.

694 **Over-complete Seeds Initialization** To generate the initial set containing centers of all  
695 potential ROIs, we construct a *randomized max pooling* process to create an over-complete  
696 set of seeds. This process first randomly selects a portion of frames  $\mathbf{I}_\alpha^s = \{\mathbf{I}_t^s\}_{t \in \alpha}$ ,  $\alpha \subseteq$   
697  $\{1, \dots, T\}$ , where  $\alpha$  is a randomized subset of frame number. We then compute the max-  
698 projection map across selected frames  $\mathbf{I}^{\max} = \max(\mathbf{I}_\alpha^s)$ , and further detect all the local max  
699 points on this map as  $\mathcal{S}$ . We repeat the above procedures multiple times, and collect the  
700 union of each map  $\mathcal{S}$  as the final over-complete set of neural seeds  $\mathcal{S}_{\text{seeds}}$ . Our randomized  
701 max pooling can improve the true positives compared with max-pooling over the entire video,  
702 because a real seed can be buried in the uneven florescence of an ROI over a long period but  
703 can most likely be discovered in a small temporal vicinity. To exclude false positive seeds  
704 from the set, we propose the following two-stage algorithm for seeds refinement.

705 **Seeds Refinement with GMM** The temporal properties of ROIs and non-ROIs can be  
706 very different. In one aspect, the ROIs often have prominent peak-valley difference  $d$ , while  
707 non-ROIs tend to be less spiky. We assume  $\{d_s | s \in \mathcal{S}_{\text{seeds}}\}$  are generated from a mixture

708 of two Gaussians  $d_s \sim \sum_{i=1}^2 \omega_i \mathcal{N}(d|\mu_i, \sigma_i^2)$ , where  $\mu_i, \sigma_i^2, \omega_i$  indicate the mean, variance,  
709 mixture proportion of the  $i$ th Gaussian component. Therefore, we can cluster the seeds  
710 based on their probabilities of belonging to each component, and only consider those having  
711 higher probabilities to the Gaussian with a larger mean as positive seeds.

712 **Seeds Refinement with LSTM** To select true ROI seeds from the over-complete set,  
713 we need to classify the seeds based on their patterns of neuronal calcium dynamics. We  
714 propose to employ Recurrent Neural Networks (RNNs) (LeCun et al., 2015) for calcium  
715 signal sequence classification. We offline trained the RNNs with a separate training dataset,  
716 composed of both positive and negative sequence chunks of length  $T_0 = 100$ , obtained  
717 with 10Hz frame rate. The training data for the RNN module were selected from a separate  
718 real dataset. The labels were manually selected by experienced neuroscientists with a  
719 conservative standard: the positive trials were the ones with most obvious calcium dynamics  
720 that were aligned to the peak of the spike, whereas the negative trials were randomly selected  
721 from the rest of the data. The training dataset contained 1000 positive and 1000 negative  
722 labels, and both the validation and the test set contained 600 balanced trials. Specifically,  
723 consider training data  $\mathcal{D} = \{\mathbf{D}_1, \dots, \mathbf{D}_N\}$ , where  $\mathbf{D}_n \triangleq (\mathbf{y}_n, l_n)$ , with input sequence  $\mathbf{y}_n$   
724 and output label  $l_n \in \{0, 1\}$ . Our goal is to learn model parameters  $\theta$  to best characterize  
725 the mapping from  $\mathbf{y}_n$  to  $l_n$  with likelihood  $p(\mathcal{D}|\theta) = \prod_{n=1}^N p(\mathbf{D}_n|\theta)$ . In our setting for  
726 sequence classification, the input is a sequence,  $\mathbf{y} = \{y_1, \dots, y_{T_0}\}$ , where  $y_t$  is the input  
727 data at time  $t$ . There is a corresponding hidden state vector  $\mathbf{h}_t \in \mathbb{R}^K$  at each time  $t$ , obtained  
728 by recursively applying the *transition function*  $\mathbf{h}_t = g(\mathbf{h}_{t-1}, \mathbf{y}_t; \mathbf{W}, \mathbf{U})$ .  $\mathbf{W}$  is *encoding*  
729 *weights*, and  $\mathbf{U}$  is *recurrent weights*. The output  $c$  for our classification is defined as the  
730 corresponding *decoding function*  $p(c|\mathbf{h}_{T_0}; \mathbf{V}) = \sigma(\mathbf{V}\mathbf{h}_{T_0})$ , where  $\sigma(\cdot)$  denotes the *logistic*  
731 *sigmoid function*, and  $\mathbf{V}$  is *decoding weights*.

732 The transition function  $g(\cdot)$  can be implemented with a *gated* activation function, such as  
733 LSTM (Hochreiter and Schmidhuber, 1997) or a Gated Recurrent Unit (GRU) (Cho et al.,



734 2014). Both LSTM and GRU have been proposed to address the issue of learning long-term  
 735 sequential dependencies. Each LSTM unit has a cell containing a state  $\mathbf{c}_t$  at time  $t$ . This cell  
 736 can be viewed as a memory unit. Reading or writing the memory unit is controlled through  
 737 sigmoid gates: input gate  $\mathbf{i}_t$ , forget gate  $\mathbf{f}_t$ , and output gate  $\mathbf{o}_t$ . The hidden units  $\mathbf{h}_t$  are  
 738 updated as follows:

$$\begin{aligned} \mathbf{i}_t &= \sigma(\mathbf{W}_i \mathbf{y}_t + \mathbf{U}_i \mathbf{h}_{t-1} + \mathbf{b}_i), & \tilde{\mathbf{c}}_t &= \tanh(\mathbf{W}_c \mathbf{y}_t + \mathbf{U}_c \mathbf{h}_{t-1} + \mathbf{b}_c), \\ \mathbf{f}_t &= \sigma(\mathbf{W}_f \mathbf{y}_t + \mathbf{U}_f \mathbf{h}_{t-1} + \mathbf{b}_f), & \mathbf{c}_t &= \mathbf{f}_t \odot \mathbf{c}_{t-1} + \mathbf{i}_t \odot \tilde{\mathbf{c}}_t, \\ \mathbf{o}_t &= \sigma(\mathbf{W}_o \mathbf{y}_t + \mathbf{U}_o \mathbf{h}_{t-1} + \mathbf{b}_o), & \mathbf{h}_t &= \mathbf{o}_t \odot \tanh(\mathbf{c}_t), \end{aligned} \quad (1)$$

739 where  $\odot$  represents the element-wise matrix multiplication operator. Note that the training of  
 740 RNNs is completed off-line, only the efficient testing stage is performed for seeds refinement.  
 741 In the testing stage, given an input  $\tilde{\mathbf{y}}$  (with missing label  $\tilde{l}$ ), the estimate for the output is  
 742  $p(\tilde{l}|\tilde{\mathbf{y}}, \hat{\boldsymbol{\theta}})$ , where  $\hat{\boldsymbol{\theta}} = \arg \max \log p(\mathcal{D}|\boldsymbol{\theta})$ . In our practical application, the testing sequence  
 743  $\tilde{\mathbf{y}} \in \mathbb{R}^T$  is often of length  $T > T_0$ . We first convert it into a bag of subsequences  $\{\tilde{\mathbf{y}}_i\}_{i=1}^{T-T_0+1}$ ,  
 744 with a sliding window of width  $T_0$  and moving step size 1. The well trained LSTMs are then  
 745 used to label the subsequences. We consider  $\tilde{\mathbf{y}}$  as positive if at least one subsequence in its  
 746 bag is classified as "calcium spike" ( $l = 1$ ), otherwise negative. Intuitively, this means that  
 747 we only care about the patterns of neural spikes, regardless of their temporal positions.

748 **Seeds Merging** Once the set of seeds is cleansed, there is still a low possibility of identi-  
 749 fying multiple seeds within a single ROI. Therefore, we merge all these redundant seeds  
 750 by computing the temporal similarity of seeds within their neighborhood, and preserving  
 751 the one with maximum intensity. Specifically, we compute the similarity based on phase-  
 752 locking information (Hahn et al., 2006). For a sequence, we extract the instantaneous phase  
 753 dynamics using Hilbert transform, and only consider the subsequences containing prominent  
 754 peaks, because all the pixels within the same ROI are highly correlated only during the  
 755 calcium spiking periods, but not necessarily during baseline period. After seeds merging,

756 we obtain  $K$  seeds, as the number of ROIs in our MINPIPE.

757 **Spatial and Temporal Initialization** The time series of the  $k$ th seed is used as initial  
 758 guess of temporal signal  $\hat{\mathbf{s}}_k$ . The spatial map of the corresponding ROI,  $\hat{\mathbf{r}}_k$ , is estimated by  
 759 pooling neighbor pixels with temporal similarity above a threshold. Because of our seeds  
 760 generating and cleansing approach, the spatiotemporal initialization in our method can be  
 761 readily parallelized. Then we fine-tune the corresponding spatial and temporal guess, by  
 762 applying semi-NMF:

$$\min \|\mathbf{z}_k - \hat{\mathbf{r}}_k \hat{\mathbf{s}}_k^\top\|$$

763 where  $\mathbf{z}_k \subset \mathbf{I}^s$  is a region containing the  $k$ th ROI. The spatial map and the temporal signal  
 764 are updated respectively:

$$\mathbf{r}_k \leftarrow \mathbf{z}_k \mathbf{s}_k (\mathbf{s}_k^\top \mathbf{s}_k)^{-1}, \quad \mathbf{s}_k \leftarrow \mathbf{s}_k \sqrt{\frac{(\mathbf{r}_k \mathbf{z}_k)^+ + \mathbf{s}_k (\mathbf{r}_k^\top \mathbf{r}_k)^-}{(\mathbf{r}_k \mathbf{z}_k)^- + \mathbf{s}_k (\mathbf{r}_k^\top \mathbf{r}_k)^+}}$$

765 where  $\mathbf{M}^+ \triangleq \frac{|\mathbf{M}| + \mathbf{M}}{2}$  and  $\mathbf{M}^- \triangleq \frac{|\mathbf{M}| - \mathbf{M}}{2}$  for any matrix  $\mathbf{M}$  (Ding et al., 2010). In total, we  
 766 now have  $K$  ROIs  $\mathbf{S}^0 = [\mathbf{s}_1, \dots, \mathbf{s}_K]$ , and temporal signals  $\mathbf{R}^0 = [\mathbf{r}_1, \dots, \mathbf{r}_K]$ . Similarly,  
 767 the background parameters  $\mathbf{b}^0, \mathbf{f}^0$  are also estimated by the same semi-NMF procedure,  
 768 using  $(\mathbf{I}^s - \sum_{k=1}^K \mathbf{r}_k \mathbf{s}_k^\top)$ .  $\mathbf{S}^0, \mathbf{R}^0, \mathbf{b}^0, \mathbf{f}^0$  are then used as initializations of the spatiotemporal  
 769 signal refinement.

770 **Spatiotemporal Signal Refinement** We perform the iterative spatial and temporal op-  
 771 timizations to update the spatial footprints of individual ROIs, and the temporal traces  
 772 with deconvolved spike trains, as proposed in CNMF. Specifically, for the neural enhanced  
 773 video  $\mathbf{X}^f$ , the method decomposes  $\mathbf{X}^f$  into a spatial dictionary  $\mathbf{R}^f \in \mathbb{R}^{P \times K}$  representing  
 774 individual ROIs, and corresponding temporal dynamics matrix  $\mathbf{S}^f \in \mathbb{R}^{T \times K}$ , in addition to

775 the background  $\mathbf{B}^f$  and the background dynamics  $\mathbf{E}$ :

$$\mathbf{X}^f = \mathbf{R}^f \mathbf{S}^{f\top} + \mathbf{B}^f + \mathbf{E}$$

776 Similarly, with the rank-1 assumption on  $\mathbf{B}^f$ , CNMF decomposes the background  $\mathbf{B}^f =$   
 777  $\mathbf{b}^f \mathbf{f}^{f\top}$ , where  $\mathbf{b}^f \in \mathbb{R}^P$  and  $\mathbf{f}^f \in \mathbb{R}^T$ . Meanwhile,  $\mathbf{S}^f$  is also correlated with underlying  
 778 action potential events:  $\mathbf{A}^f = \mathbf{S}^{f\top} \mathbf{G}^f$ , where  $\mathbf{A}^f \in \mathbb{R}^{K \times T}$ , and  $\mathbf{G}^f \in \mathbb{R}^{T \times T}$  is the coefficient  
 779 matrix of the low-order autoregression. The variables  $\mathbf{R}^f, \mathbf{S}^f, \mathbf{b}^f, \mathbf{f}^f$  are therefore estimated  
 780 via iteratively alternating between the following two steps [26].

781 **Estimating Spatial Variables** Given the estimates of temporal variables  $\mathbf{S}^{f(\ell-1)}$  and  
 782  $\mathbf{f}^{f(\ell-1)}$  from the last iteration, the spatial parameters can be updated by solving the problem:

$$\begin{aligned} & \min_{\mathbf{R}^f, \mathbf{b}^f} \|\mathbf{R}^f\|_1, \text{ s.t. } \mathbf{R}^f, \mathbf{b}^f \geq 0 \\ & \|\mathbf{X}^f(i, :) - \mathbf{R}^f(i, :) \mathbf{S}^{f(\ell-1)\top} - \mathbf{b}^f(i) \mathbf{f}^{f(\ell-1)\top}\| \leq \sigma_i \sqrt{T} \end{aligned}$$

783 where  $\mathbf{X}^f(i, :)$  is the  $i$ th row of the matrix  $\mathbf{X}^f$ ,  $\mathbf{b}^f(i, :)$  is the  $i$ th element of the vector.  $\epsilon_i \sqrt{T}$   
 784 is the empirically selected noise residual constraint of the corresponding pixel. This is  
 785 essentially a basis pursuit denoising problem, and it is solved by the least angular regression  
 786 (Efron et al., 2004) in implementation.

787 **Estimating Temporal Variables** Given the estimates of spatial variables  $\mathbf{R}^f, \mathbf{b}^f$  and  
 788 temporal parameters  $\mathbf{S}^{f(\ell-1)}, \mathbf{f}^{f(\ell-1)}$  from the last iteration, the temporal parameters can be  
 789 updated by solving the problem:

$$\begin{aligned} & \min_{\mathbf{S}^f, \mathbf{f}^f} \sum_{k=1}^K \mathbf{1}^\top \mathbf{G}^f \mathbf{S}^f, \text{ s.t. } \mathbf{G}^f \mathbf{s}_k^f \geq 0, k = 1, \dots, K \\ & \|\mathbf{X}^f(i, :) - \mathbf{R}^f(i, :) \mathbf{S}^{f(\ell-1)} - \mathbf{b}^f(i) \mathbf{f}^{f(\ell-1)\top}\| \leq \sigma_i \sqrt{T} \end{aligned}$$

790 Unlike in CNMF, where the spatial footprints are serially updated and subtracted from  
791 the preceding residuals, we extract spatial footprints from the original data that does not  
792 depend on preceding iterations. Therefore, the information loss/duplication is reduced and  
793 the optimization procedures can be parallelized in our method.

794 **Data availability** The data that support the findings of this study are available from the  
795 corresponding authors upon request.

796 **Code availability** The codes will be freely available upon publication, and the beta version  
797 is available for reviewers upon request.
